# Supplementary material for: STM analysis of surface-adsorbed conjugated oligo(p-phenylene-ethynylene) (OPE) nanostructures
Source: Royal Society of Chemistry journal article supplement (doi:10.1039/c6cp06030g), 2016-01-01
Supplement: c6cp06030g1.pdf [file c6cp06030g1.pdf]

## STM Investigation of the Conjugated Oligo(p-phenylene-ethynylene) (OPE) Surface Nanostructures

Mengqi Shen,<sup>†ab</sup> Zhouyang Luo,<sup>†c</sup> Yanfang Geng,<sup>b</sup> Wei Hu,<sup>c</sup> Siqi Zhang,<sup>ab</sup> Yongqing Lai,<sup>ab</sup> Bo Liu,<sup>a</sup> Wubian Duan,<sup>\*a</sup> Dahui Zhao,<sup>\*c</sup> Ke Deng,<sup>\*b</sup> and Qingdao Zeng<sup>\*b</sup>

<sup>a</sup>Department of Chemistry, School of Science, Beijing Jiaotong University, Beijing, 100044, China. E-mail: wbduan@bjtu.edu.cn.

<sup>b</sup>CAS Key Laboratory of Standardization and Measurement for Nanotechnology, CAS Center for Excellence in Nanoscience, National Center for Nanoscience and Technology (NCNST), Beijing 100190, P. R. China. E-mail: zengqd@nanoctr.cn, kdeng@nanoctr.cn.

<sup>c</sup>Beijing National Laboratory for Molecular Sciences, the Key Laboratory of Polymer Chemistry and Physics of the Ministry of Education, College of Chemistry, Peking University, Beijing 100871, China. E-mail: dhzhao@pku.edu.cn.

<sup>†</sup> These authors contributed equally to this work.

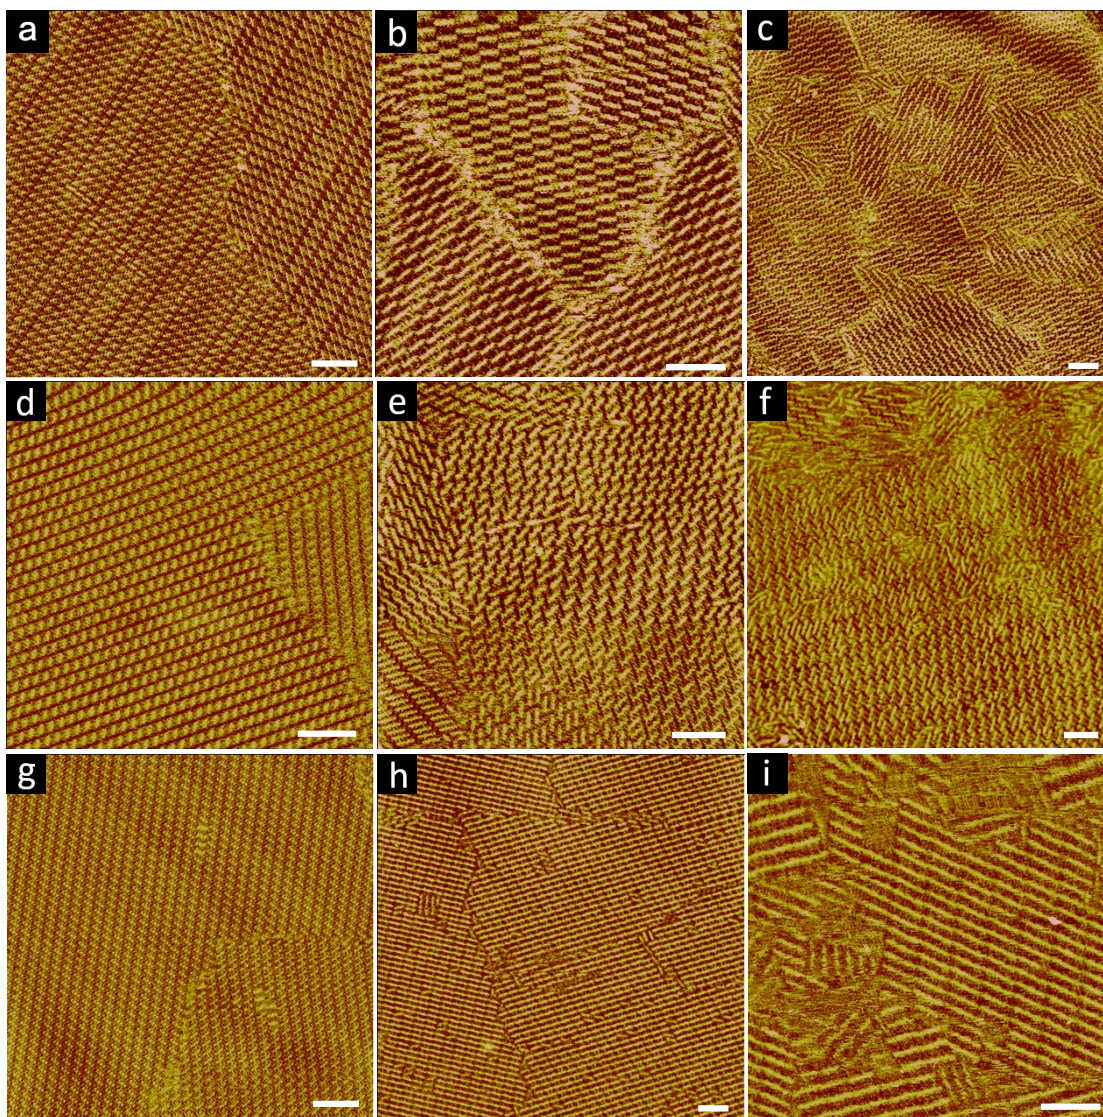

**Fig. S1** Large-scale STM images for the self-assembled structures of compounds **1a** (a:  $I_{\text{set}} = 329.6$  pA,  $V_{\text{bias}} = 501.6$  mV), **1b** (b:  $I_{\text{set}} = 268.6$  pA,  $V_{\text{bias}} = 579.9$  mV), **1c** (c:  $I_{\text{set}} = 296.0$  pA,  $V_{\text{bias}} = 447.4$  mV), **4a** (d:  $I_{\text{set}} = 397.0$  pA,  $V_{\text{bias}} = 418.5$  mV), **4b** (e:  $I_{\text{set}} = 299.1$  pA,  $V_{\text{bias}} = 423.4$  mV), **4c** (f:  $I_{\text{set}} = 299.1$  pA,  $V_{\text{bias}} = 618.5$  mV), **5a** (g:  $I_{\text{set}} = 329.6$  pA,  $V_{\text{bias}} = 541.7$  mV), **5b** (h:  $I_{\text{set}} = 299.1$  pA,  $V_{\text{bias}} = 630.1$  mV), and **5c** (i:  $I_{\text{set}} = 299.1$  pA,  $V_{\text{bias}} = 509.0$  mV) at the chloroform/HOPG interfaces with the scale bars of 10 nm.
